# Supplementary material for: Synthesis, characterization, biological properties, and molecular docking studies of new phosphoramide-based Ag(i) complexes
Source: Royal Society of Chemistry journal article supplement (doi:10.1039/d2nj02748h), 2022-01-01
Supplement: d2nj02748h1.pdf [file d2nj02748h1.pdf]

## Electronic Supplementary Material

### **Synthesis, characterization, biological properties, and molecular docking studies of new phosphoramidate-based Ag(I) complexes**

Khodayar Gholivand<sup>\*, a</sup>, Mohammad Faraghi<sup>†, a</sup>, Samaneh K. Tizhoush<sup>†, a</sup>, Sara Ahmadi<sup>a</sup>, Mostafa Yousefian<sup>b</sup>, Fahimeh Mohammadpanah<sup>a</sup> and S. Mark Roe<sup>c</sup>

## Materials and methods

All chemicals and solvents used in the syntheses were commercially available and were used without further purification. IR spectrum was recorded on a Nicolet 510P spectrophotometer using KBr disks. Elemental analysis was performed using a Heraeus CHN-O-RAPID apparatus.

## Methods

### X-ray crystallography

colorless crystal of **C<sub>m</sub>** was obtained from the C<sub>2</sub>H<sub>5</sub>OH/H<sub>2</sub>O. The X-ray data for the reported structures were collected at 293(2) K with an Oxford Sapphire CCD diffractometer using Cu K $\alpha$  radiation  $\lambda = 1.54184 \text{ \AA}$  and  $\omega$ -2 $\theta$  method. All structures were solved by direct methods and refined with the full-matrix least-squares method on F<sup>2</sup> with the use of SHELX2014 program packages.<sup>1</sup> The analytical absorption corrections were applied (CrysAlis version 171.38.43 package of programs<sup>2</sup> Rigaku OD., 2015). Positions of hydrogen atoms have been found from the electron density maps and hydrogen atoms were constrained during refinement with the appropriate riding model as implemented in SHELX during refinement. The data collection and refinement processes are summarized in Table S1. The structural data has been deposited at the Cambridge Crystallographic Data Centre: (CCDC No for structure **C<sub>m</sub>** is 2150302)

**Table S1** Crystal data and structure refinement parameters for **C<sub>m</sub>**

| Identification code                         | <b>C<sub>m</sub></b>                                                                          |
|---------------------------------------------|-----------------------------------------------------------------------------------------------|
| Empirical formula                           | C <sub>34</sub> H <sub>34</sub> Ag <sub>2</sub> N <sub>6</sub> O <sub>10</sub> P <sub>2</sub> |
| Formula weight                              | 964.35                                                                                        |
| Temperature/K                               | 293.0                                                                                         |
| Crystal system                              | monoclinic                                                                                    |
| Space group                                 | C2/c                                                                                          |
| a/Å                                         | 16.6319(8)                                                                                    |
| b/Å                                         | 9.1023(5)                                                                                     |
| c/Å                                         | 24.8356(16)                                                                                   |
| α/°                                         | 90                                                                                            |
| β/°                                         | 97.289(5)                                                                                     |
| γ/°                                         | 90                                                                                            |
| Volume/Å <sup>3</sup>                       | 3729.5(4)                                                                                     |
| Z                                           | 4                                                                                             |
| ρ <sub>calc</sub> /cm <sup>3</sup>          | 1.718                                                                                         |
| μ/mm <sup>-1</sup>                          | 9.794                                                                                         |
| F(000)                                      | 1936.0                                                                                        |
| Crystal size/mm <sup>3</sup>                | 0.18 × 0.12 × 0.04                                                                            |
| 2θ range for data collection/°              | 7.176 to 136.502                                                                              |
| Index ranges                                | -19 ≤ h ≤ 16, -10 ≤ k ≤ 6, -29 ≤ l ≤ 24                                                       |
| Reflections collected                       | 6341                                                                                          |
| Independent reflections                     | 3352 [R <sub>int</sub> = 0.0252, R <sub>sigma</sub> = 0.0367]                                 |
| Data/restraints/parameters                  | 3352/0/245                                                                                    |
| Goodness-of-fit on F <sup>2</sup>           | 1.064                                                                                         |
| Final R indexes [I >= 2σ (I)]               | R <sub>1</sub> = 0.0397, wR <sub>2</sub> = 0.1081                                             |
| Final R indexes [all data]                  | R <sub>1</sub> = 0.0466, wR <sub>2</sub> = 0.1139                                             |
| Largest diff. peak/hole / e Å <sup>-3</sup> | 1.07/-0.67                                                                                    |

**Table S2** Selected bond length (Å) and angles (°) around Ag (I) for complex **C<sub>m</sub>**

| <b>C<sub>m</sub></b> |             |            |            |
|----------------------|-------------|------------|------------|
| Ag1–O2               | 2.211(3) Å  | Ag1–O4     | 2.618(4) Å |
| Ag1–N1               | 2.185(3) Å  | Ag1–O4     | 2.658(4) Å |
| N1–Ag1–O2            | 163.07(13)° | O4– Ag1–O2 | 83.6(1)°   |
| O4– Ag1–O4           | 80.4(1)°    | O4– Ag1–N1 | 90.5(1)°   |

## References

1. G. M. Sheldrick, *Acta Cryst.*, 2015, C71, 3-8.
2. CrysAlis 171.38.43 package of programs, *Rigaku Oxford Diffraction*, 2015.
